1 **Manganese oxide biomineralization is a social trait protecting**  
2 **against nitrite toxicity.**

3

4 Christian Zerfaß<sup>a,b</sup>, Joseph A. Christie-Oleza<sup>a,b</sup>, and Orkun S. Soyer<sup>a,b,\*</sup>

5 <sup>a</sup> School of Life Sciences, BBSRC/EPSRC Warwick Integrative Synthetic Biology Centre (WISB),

6 University of Warwick, Coventry, CV4 7AL, UK. <sup>b</sup> Warwick Integrative Synthetic Biology Centre

7 (WISB), University of Warwick, Coventry, CV4 7AL, UK.

8

9 KEYWORDS: microbial ecology, biomineralization, metal recovery, biotechnology, community  
10 function, social behavior, exoenzyme, reactive oxygen species, *Roseobacter sp.* AzwK-3b.

11 **Corresponding Author**

12 \* O.Soyer@warwick.ac.uk (O.S.S.)

## 13 **Abstract**

14 Manganese bio-mineralization by oxidation is a costly but, still, widespread process  
15 among bacteria and fungi. While certain potential advantages of manganese oxidation have  
16 been suggested, to date there is no conclusive experimental evidence for, how and if this  
17 process impacts microbial fitness in the environment. Here we show how a model organism  
18 for manganese oxidation, *Roseobacter sp.* AzwK-3b, is growth-inhibited by nitrite, and that  
19 this inhibition is mitigated when manganese is added to the culture medium. We show that  
20 manganese-mediated mitigation of nitrite-inhibition is dependent on the culture inoculum  
21 size, with larger inocula being able to withstand higher concentrations of nitrite stress.  
22 Furthermore, the bio-mineralized manganese oxide ( $MnO_x$ ) forms granular precipitates in the  
23 culture, rather than sheaths around individual cells. These findings support the notion that  
24  $MnO_x$  is a shared community product that improves the cultures' survival against nitrite-  
25 stress. We show that the mechanistic basis of the  $MnO_x$  effect involves both its ability to  
26 catalyze nitrite oxidation into (non-toxic) nitrate under physiological conditions, and its  
27 potential role in influencing redox chemistry around reactive oxygen species (ROS). Taken  
28 together, these results provide for the first direct evidence of improved microbial fitness by  
29  $MnO_x$  deposition in an ecological setting, i.e. mitigation of nitrite toxicity, and point to a key  
30 role of  $MnO_x$  in handling stresses arising from ROS. These findings could be of general  
31 relevance for all organisms oxidizing manganese, allowing them to offset costs associated  
32 with extracellular bio-mineralization.

## 33 **Introduction**

34 A large variety of biominerals based on different cations (e.g. iron, manganese,  
35 calcium) and anions (e.g. carbonates, oxides, phosphates) are deposited by different  
36 microorganisms (1). One of these is manganese oxide (2–5), which is deposited by the  
37 oxidation of soluble  $Mn^{II}$ . Microbial  $Mn^{II}$  oxidation received attention with the discovery of  
38 polymetallic, manganese-rich biogenic deep sea nodules, which have been shown to harbor  
39 both manganese-oxidizing, and manganese-reducing organisms (6). While it is suggested that  
40 such nodules could potentially be mined for rare earth elements, and that the associated  
41 metal-active organisms utilized in biotechnology of metal recovery (2, 3, 5–8), it remains  
42 unclear in many cases why organisms show such metal-oxidizing and -reducing activities. In

43 the case of metal-reducing organisms, it has been shown that metabolic energy can be gained  
44 under anaerobic conditions from using metal oxides (i.e. manganese, iron, or others) as an  
45 alternative terminal electron acceptor (9–11). The potential evolutionary advantages of  
46 metal-oxidation, and in particular manganese oxidation meanwhile is not well understood (2,  
47 7, 8).

48 Some metals can be oxidized by microbes and act as an inorganic energy source for  
49 so-called chemolithotrophic growth, as in the case of iron lithotrophy (12). Chemolithotrophy  
50 on manganese has been suggested but little experimental evidence has been found so far (2).  
51 Two other common hypotheses for manganese oxidation are that the resulting manganese  
52 oxides ( $MnO_x$ ) can increase accessibility of organic nutrients or protect microbes from  
53 potentially toxic compounds (13). The validity of the latter hypothesis remains to be tested  
54 conclusively.  $MnO_x$  has been shown to react with complex organic (i.e. humic) substances  
55 (14), but it is not clear if the resulting organic products from such reactions are utilized by  
56 microbes. It is suggested that certain fungi employ ligand-stabilized  $Mn^{III}$  to oxidize  
57 recalcitrant litter (15), but these studies were not performed with single (defined)  
58 carbon/energy sources. Similarly, the former hypothesis regarding the protective potential of  
59  $MnO_x$  remains unproven to date (2, 7). It has been suggested that  $MnO_x$  precipitates can act  
60 as strong sorbents of heavy metals, hence mitigating the toxic effects of such metals on  
61 microorganisms, but this has yet to be tested in a biological context (2). Taken together, the  
62 biological significance of microbial manganese oxidation remains a paradox, as no benefits  
63 have been demonstrated for this costly metabolic process

64 In recent years, *Roseobacter sp.* AzwK-3b emerged as a model organism to study the  
65 generation of  $MnO_x$  (16). AzwK-3b is a bacterium that shows significant manganese oxidizing  
66 activity *in vitro* when grown in a complex (rich) K-Medium (16). This activity was shown to be  
67 mediated by a secreted exoenzyme - a haem type oxidase - that can catalyze the generation  
68 of superoxides from NADH and oxygen. The resulting superoxide can in turn facilitate the  $Mn^{II}$   
69 oxidation into  $Mn^{III}$ , which undergoes further disproportionation to result in  $MnO_2$  (17–21) –  
70 or more specifically mixed valence state  $MnO_x$ . The required NADH for this exoenzyme-  
71 mediated reaction is presumably secreted also by AzwK-3b (17). Thus, these mechanistic  
72 findings strongly suggest that AzwK-3b is making a significant metabolic investment into

73 production of  $MnO_x$ . It is currently not clear how such a costly strategy benefits individual  
74 cells and how it could have been maintained over evolutionary timescales.

75 In an attempt to better understand the ‘fitness’ impact of manganese oxidation, we  
76 have studied the physiology of *Roseobacter sp.* AzwK-3b in more detail. We identified a  
77 defined medium composition that allowed growth of this bacterium both with and without  
78 manganese. While we found no significant differences in growth rate under these two  
79 conditions, we found that the manganese oxidizing activity of *Roseobacter sp.* AzwK-3b  
80 supports growth of the bacterium at nitrite concentrations that fully prevent growth in  
81 a manganese-free culture. We found that  $MnO_x$  forms as granules dispersed among cells, and  
82 its nitrite-inhibition mitigation effects show a significant population size effect, conforming to  
83 a ‘community commodity’ nature of this compound. Mechanistically, we show that biogenic  
84  $MnO_x$  was able to catalyze nitrite oxidation into nitrate under physiological conditions, and  
85 that the mitigation of nitrite-inhibition was also affected by NADH. These results suggest that  
86 the ability of  $MnO_x$  to alleviate nitrite toxicity relates to providing catalytic scavenging of  
87 reactive oxygen species (ROS) within the environment.

## 88 Results

89 To study the role of manganese oxidation on microbial fitness we have focused here  
90 on *Roseobacter sp.* AzwK-3b, which has recently emerged as a model organism for this  
91 process (2, 8). We refer to the oxidation product as  $MnO_x$ , since biogenic manganese oxides  
92 are usually precipitates with mixed manganese oxidation states, particularly  $Mn^{II}$ ,  $Mn^{III}$  and  
93  $Mn^{IV}$  (2, 26). AzwK-3b has been shown to oxidize manganese to  $MnO_x$  by means of an  
94 excreted exoenzyme and NADH, and potentially involving an elaborate redox reaction path  
95 (17–21). We have first attempted to identify fully-defined growth conditions for this  
96 bacterium, which has been to date studied in complex K-medium (16), an artificial seawater  
97 derived, peptone/yeast extract containing medium (16, 27). Through systematic analysis of  
98 media composition, we have created a fully defined medium that supports AzwK-3b growth  
99 (from now on referred to as modified artificial seawater medium, ASW<sub>m</sub>) (Table 1). This  
100 exercise revealed also the requirement for five vitamin supplements for growth (Figure S1).  
101 Given this defined culture medium, we were then able to interrogate the impact of  
102 manganese on the growth of AzwK-3b.

103

104 **Manganese oxidation does not impact growth rate.** Despite potentially significant costs  
105 associated with exoenzyme and NADH investment, we did not find any substantial difference  
106 in growth rates and steady state population sizes with increasing Mn<sup>II</sup> concentration and with  
107 25 mM acetate (Figure 1). A slightly slower growth at the highest manganese concentration  
108 (500 μM) was observed, but it was difficult to ascertain this effect, as both MnO<sub>x</sub> particles  
109 and cells co-aggregating with those particles could have interfered with the absorbance  
110 measurements. The slightly reduced growth rate at 200 μM Mn<sup>II</sup>Cl<sub>2</sub> is in line with an earlier  
111 report on AzwK-3b, where 100 μM Mn<sup>II</sup> was found to decrease the growth rate in (complex)  
112 K-medium (16). Other manganese-oxidizing bacteria, such as *Erythrobacter sp.* SD-21 (28, 29)  
113 and a marine *Bacillus* strain (30), were reported to grow better when cultured with Mn<sup>II</sup>-  
114 supplement. In light of these different findings and possible difficulties with growth rate  
115 measurements in the presence of manganese precipitation, we cannot be fully conclusive  
116 about the growth effects associated with manganese oxidation based on the presented  
117 results, however, they are suggestive of a low or no-impact on growth rate.

118

119 **Manganese oxidation mitigates nitrite growth inhibition.** With growth effects being limited,  
120 a possible alternative explanation for a positive role of manganese oxidation is a protective  
121 effect against inhibitors or stresses (2, 13). Here, we evaluated this hypothesis for nitrite.  
122 Nitrite is commonly found in the environment, where it results from the reduction of nitrate,  
123 a key terminal electron acceptor utilized by many microbes (31). We found nitrite inhibited  
124 the growth of AzwK-3b in manganese-free cultures, where already as little as 0.25 mM nitrite  
125 prevented growth of AzwK-3b (Figure 2A). No growth was detected at and above 0.5 mM  
126 nitrite. Note that a salinity effect at such low concentrations of nitrite (which was added as  
127 sodium nitrite) is highly unlikely. To further rule out this possibility, we additionally analyzed  
128 the growth of AzwK-3b at different salinity levels using concentrations of sodium chloride  
129 from 200 mM (default in the defined ASW<sub>m</sub> medium employed here) up to 428 mM (default  
130 in the ASW medium (22)). This confirmed that salinity effects on growth in this range are  
131 minimal (Figure S2), and higher salinity is rather favorable for AzwK-3b growth. Thus, the  
132 effects of nitrite are due to toxicity rather than salinity.

133 With the addition of 200  $\mu\text{M}$   $\text{Mn}^{\text{II}}$ , we found that AzwK-3b is able to grow in the  
134 presence of up to 1 mM nitrite (Figure 2B). Increasing the nitrite concentration still affected  
135 both the growth rate and maximal culture density (based on  $A_{600}$ ), but this effect was much  
136 lower compared to the manganese-free cultures (Figure 2). To overcome any potential  
137 confounding effects of  $\text{MnO}_x$  precipitation on spectroscopic culture density measurements,  
138 we additionally quantified acetate consumption by ion chromatography as a proxy for  
139 growth. As expected, manganese-free cultures with 0.25 mM (or higher) nitrite showed only  
140 insignificant decrease in acetate, while the  $\text{Mn}^{\text{II}}$  supplemented cultures showed acetate  
141 consumption in accordance with the  $A_{600}$  measurements (see Figure S3). These findings  
142 confirm that  $\text{Mn}^{\text{II}}$  supplementation allows AzwK-3b to withstand nitrite inhibition.

143

144 **Nitrite-inhibition relief is a community function that depends on culture size and that is**  
145 **mediated by dispersed, granular  $\text{MnO}_x$  precipitates.** It has been shown that  $\text{MnO}_x$   
146 precipitation by AzwK-3b is mediated by secreted exoenzymes (17). It is not known, however,  
147 whether the process of  $\text{MnO}_x$  precipitation occurs primarily on individual cell surfaces, or  
148 whether it is a population level process with the secreted enzymes conferring to the notion  
149 of a “community commodity” (32–35). We hypothesized that these two different scenarios  
150 could be distinguished by analyzing population size effects on  $\text{MnO}_x$  mediated mitigation of  
151 nitrite-inhibition. In particular, we designed an experiment in which cultures pre-grown  
152 without  $\text{Mn}^{\text{II}}$  are subsequently sub-cultured into media with  $\text{Mn}^{\text{II}}$  and nitrite, using different  
153 inoculum size (Figure S4). We argue that in the case of  $\text{MnO}_x$  precipitation being a process  
154 confined to individual cells, there should be no effect of inoculation size.

155 We found that manganese mediated mitigation of nitrite inhibition was dependent on  
156 inoculum size (Figure 3). A pre-culture was grown without nitrite and manganese, and from  
157 this, inocula were generated at two different time points within the first third of the  
158 exponential phase (labelled IT1 and IT2 in Figure S4). When these inocula were subjected to  
159 nitrite in the main-culture, the earlier, low-density inoculum IT1 was inhibited by nitrite  
160 regardless of the presence or absence of  $\text{Mn}^{\text{II}}$  (Figure 3 A,B), while manganese-mediated  
161 mitigation of nitrite inhibition was clearly evident for the larger, high-density inoculum IT2  
162 (Figure 3 C,D). In the IT1 cultures half of the acetate was unused at 0.25 mM nitrite, and  
163 gradually more acetate resided with increasing nitrite concentration (Figure S5). In the IT2

164 cultures with Mn<sup>II</sup> supplementation, however, acetate was completely removed at all nitrite  
165 levels below 2.5 mM and only 25 – 50 % of acetate remained at 5 – 10 mM nitrite. In the  
166 control samples (no inoculation) there was no change in acetate concentration ruling out any  
167 cross-activity with manganese.

168         Rather than a true population size effect, these observed inocula effects could be due  
169 to cells from the Mn-free, early-phase pre-cultures not having ‘turned on’ expression of  
170 exoenzymes required for MnO<sub>x</sub> precipitation. To rule out this possibility, we performed an  
171 additional experiment, where the pre-cultures were already grown with 200 μM Mn<sup>II</sup>. Using  
172 this pre-adapted culture, inocula were again prepared by sampling at different growth time  
173 points (IT 1 – 4 in Figure S6, A). Cultures grown from these different inocula displayed much  
174 weaker inhibition by increasing nitrite concentrations up to 10 mM (Figure S6, B) and were  
175 able to consume acetate (Figure S6, C), yet there were still inoculum size effects on  
176 overcoming nitrite inhibition (Figure 4, green). Interestingly, the extent of this effect seems  
177 similar to that observed with inocula originating from pre-cultures grown without Mn<sup>II</sup> but  
178 supplied with Mn<sup>II</sup> after subculturing into nitrite containing media (Figure 4, blue). In  
179 particular, at 5 and 10 mM nitrite, maximum growth rate (and final density) data from all  
180 these cultures showed a strong nonlinear correlation to initial inocula density that can be  
181 fitted to a sigmoidal curve. (Figure 4, black line). The inflection point of this curve happened  
182 at a lower inoculum size for those cultures that were not supplied with Mn<sup>II</sup> at any stage  
183 (Figure 4, red). Thus, we conclude that there is an inoculum density effect on the ability of  
184 Mn<sup>II</sup> supplemented cultures to tolerate nitrite irrespective of their culturing history, but that  
185 this effect is stronger for cultures not pre-grown with Mn<sup>II</sup>. There were no such effects  
186 without nitrite or without Mn<sup>II</sup> (Figure 4).

187         These results strongly suggest that MnO<sub>x</sub> precipitation is a community level function.  
188 To further collaborate on this result, we explored the micro-structure of the AzwK-3b cultures  
189 in the presence of Mn<sup>II</sup>. Analysis of cultures using electron microscopy revealed that MnO<sub>x</sub>  
190 precipitates as granules dispersed within the culture, and attaching to clusters of cells, rather  
191 than forming sheaths around individual cells (as seen in some other cases of metal oxide  
192 precipitations (36)) (Figure 5, left). Employing electron dispersive X-ray spectroscopy, we  
193 confirmed that these granular structures contained manganese, while no manganese was  
194 detected in locations with cells only (i.e. without granular structures, see Figure 5, right).

195

196 **MnO<sub>x</sub> mediated nitrite protection involves redox reactions and oxygen radicals.** After  
197 establishing the community level functionality of biogenic MnO<sub>x</sub> as a protective agent against  
198 nitrite, we next wanted to evaluate the mechanistic basis of this function in the context of  
199 nitrite toxicity. While multiple mechanisms of nitrite-toxicity are reported (37, 38), two key  
200 reactive species are usually implicated, i.e. free nitrous acid (39) and peroxyxynitrite. The former  
201 forms through protonation of nitrite, while the latter forms from the reaction of nitrite with  
202 hydrogen peroxide (40–42). Thus, two non-exclusive, possible mechanisms of MnO<sub>x</sub> relief on  
203 nitrite toxicity are: (i) MnO<sub>x</sub> catalyzed oxidation of nitrite to nitrate (a reaction that has been  
204 shown to be feasible chemically under low pH (43)) and thereby avoiding formation of either  
205 free nitrous acid or peroxyxynitrite; or (ii) MnO<sub>x</sub> catalyzed degradation of hydrogen peroxide  
206 and thereby avoiding the reaction of this compound with nitrite to form peroxyxynitrite.

207 To see if AzwK-3b generated MnO<sub>x</sub> can catalyze nitrite oxidation under physiological  
208 conditions, we collected it from culture supernatants and evaluated its reactivity with nitrite  
209 in our ASW<sub>m</sub>-medium at pH = 8.0. Over 27 days, we found nitrite oxidation by biogenic MnO<sub>x</sub>  
210 in a dose dependent manner, while neither synthetic MnO<sub>2</sub> powder nor the MnO<sub>x</sub>-free  
211 supernatant solution showed any significant nitrite oxidation (Figure 6A). The trend of nitrite  
212 oxidation matched with nitrate production (Figure 6B), thus confirming the assumed reaction  
213 pathway of nitrite-oxidation into nitrate (43). Taking into account the difficulties of accurately  
214 determining the amount of precipitated MnO<sub>x</sub> that were added into the nitrite assay, we can  
215 still estimate that the condition with highest MnO<sub>x</sub> levels contained at least 1-2 mM (with  
216 respect to Mn). This presents a stoichiometric minimum 2-fold excess over nitrite (at 0.5 mM),  
217 hence enough for complete nitrite oxidation. The fact that this reaction didn't proceed further  
218 than an oxidation of ~0.18 mM nitrite (i.e. ~35 %) indicates that either the biogenic MnO<sub>x</sub> was  
219 only partially reactive or that its reactivity reduced over time (as known to be the case for  
220 synthetic manganese oxides (2, 13)). Sample pH remained relatively stable with the biogenic  
221 MnO<sub>x</sub>, while samples without manganese and with synthetic MnO<sub>2</sub> reached a pH of 6.9 and  
222 6.8, respectively at the end of the experiment (from an initial pH of 8.2 of the medium). This  
223 acidification of the control samples might be due to carbon dioxide dissolution, which might  
224 have been buffered in the samples with biogenic MnO<sub>x</sub> due to proton consumption during



225 nitrite oxidation, or due to co-precipitated organic solutes (polymers, proteins) from the cell-  
226 free supernatant.

227         These findings confirmed that the biogenic MnO<sub>x</sub> were capable to oxidize nitrite at  
228 physiological conditions, and prompted us to test MnO<sub>x</sub> mediated nitrite oxidation directly in  
229 AzwK-3b cultures. We found some evidence for decreasing nitrite concentration in different  
230 cultures tested, but this was not significant (Figure S7), and some decrease was also seen in  
231 the manganese free cultures (indicating possible measurement effects in the solution). If  
232 nitrite oxidation was the main mechanism of MnO<sub>x</sub> mediated protection *in vivo*, these  
233 cultures would have been expected to oxidize most of the nitrite present in the media. Thus,  
234 we conclude that under our experiment conditions nitrite-oxidation was only a potential  
235 contributing factor.

236         A plausible alternative mechanism of MnO<sub>x</sub> mediated nitrite-inhibition relief could be  
237 related to formation of reactive peroxyxynitrite, which is shown to be highly toxic to bacteria  
238 (41, 42, 44, 45), and which can form at low pH from the reaction of hydrogen peroxide with  
239 nitrite (40). If peroxyxynitrite is the main species underpinning nitrite toxicity, then, MnO<sub>x</sub>  
240 protection against nitrite could be due to its ability to degrade hydrogen peroxide and thereby  
241 reducing the rate of peroxyxynitrite formation. The reactivity of MnO<sub>x</sub> towards hydrogen  
242 peroxide has been demonstrated chemically (40, 46–53), but never shown or tested in a  
243 biological context. Here, we hypothesized that if these types of redox reactions were involved  
244 in MnO<sub>x</sub> mediated mitigation of nitrite-inhibition, the process dynamics can be modulated  
245 with the introduction of additional hydrogen peroxide or NADH (which can help increase the  
246 rate of MnO<sub>x</sub> formation (18), but which can also be directly involved in hydrogen peroxide  
247 reduction through peroxidase-catalysed reactions (54–58)). To test this hypothesis, we again  
248 grew pre-cultures of AzwK-3b without Mn<sup>II</sup> and sub-cultured these in medium containing Mn<sup>II</sup>  
249 and nitrite, but at the same time also spiking in hydrogen peroxide or NADH. Hydrogen  
250 peroxide spiking did not show any effect on nitrite inhibition or its release by Mn<sup>II</sup>  
251 supplementation (Figure S8), possibly due to spiked hydrogen peroxide being cleared  
252 primarily through additional peroxidases rather than impacting MnO<sub>x</sub> mediated process  
253 dynamics. In line with this hypothesis, spiking NADH resulted in full mitigation of nitrite  
254 inhibitory effect (even without Mn<sup>II</sup>) (Figure 7). This suggests that nitrite toxicity relates to  
255 peroxyxynitrite formation via hydrogen peroxide, which can be decomposed by MnO<sub>x</sub> (as

256 shown before (40, 46–53)) or NADH-utilizing peroxidases (that are shown to be present in  
257 *Roseobacter* species including AzwK-3b (17, 59) (see also Table S1)).

## 258 Discussion

259 Manganese bio-mineralization into  $MnO_x$  is widespread among bacteria, but there is  
260 no clarity about its evolutionary advantage. Here, we developed a defined growth media for  
261 the manganese oxidizing model organism *Roseobacter* sp. AzwK-3b and demonstrated that  
262 this organism's strong growth-inhibition by nitrite is mitigated through its ability to  
263 precipitate biogenic  $MnO_x$ . We found that this  $MnO_x$ -mediated mitigation of nitrite toxicity is  
264 dependent on population size, and that  $MnO_x$  forms dispersed granules that are attached to  
265 clusters of cells in the population. These observations, combined with the established role of  
266 exoenzymes in the formation of  $MnO_x$  precipitates, suggests that these provide a community  
267 function to AzwK-3b and allows cultures grown to sufficient density in the presence of  
268 manganese to become resistant to the inhibitory effects of nitrite. Our attempts to elucidate  
269 the mechanistic basis of this functionality showed that biogenic  $MnO_x$  can oxidise nitrite to  
270 nitrate (under conditions that synthetic  $MnO_2$  cannot). Together with the known ability of  
271  $MnO_x$  to degrade hydrogen peroxide (40, 46–53), these findings show that biogenic  $MnO_x$  can  
272 inhibit the two key routes to the formation of reactive nitrite species.

273 These findings provide for the first-time a direct evidence for the impact of  $MnO_x$  on  
274 an organism's growth, thus demonstrating a positive fitness effect and a possible evolutionary  
275 explanation to the costly process of  $MnO_x$  oxidation. Other suggested functional roles for this  
276 process to date were either hypothetical or were based on experiments with synthetic  
277 manganese oxide counterparts (2, 7, 8), and none of them were fully confirmed in a biological  
278 context. While mitigation of nitrite inhibition might not be the only evolutionary advantage  
279 of  $MnO_x$  oxidation in AzwK-3b or other manganese oxidizing species, it is definitely an  
280 ecologically relevant function. Nitrite is a known inhibitor in the environment (37, 38, 60),  
281 including in wastewater treatment applications (39). In the case of AzwK-3b, this ecological  
282 relevance is highly suggestive, as this species was isolated from an "agriculturally impacted,  
283 shallow salt marsh" (16) where nitrite (among other nitrogen species) can occur due to  
284 microbial conversion of nitrogen fertilizers (61–64). It is also interesting to note that oceanic  
285 manganese-rich modules are found to contain both manganese oxidizing and reducing

286 bacteria (6), with current-day representatives of the latter group, such as *Shewanella*  
287 *oneidensis* (9), also being nitrate-reducers (65–67).

288 Our study opens up additional investigations into the mechanism of nitrite toxicity and  
289 the role of  $\text{MnO}_x$  oxidation in it. Multiple mechanisms of nitrite-inhibition of bacteria have  
290 been reported (37, 38), and a key role for free nitrous acid (i.e. protonated nitrite) (39) and  
291 peroxyxynitrite, from nitrite and hydrogen peroxide (40–42), is proposed. Both molecules can  
292 prevent chemiosmotic coupling, and are primarily formed at low pH (nitrite is often found to  
293 inhibit bacteria growth at  $\text{pH} < 7$  (41, 42)). The formation of these reactive nitrite species can  
294 be enhanced in the vicinity of the cells, where a locally lowered pH (from chemiosmotic  
295 coupling) and an increased hydrogen peroxide concentration (due to cellular metabolic  
296 activity (44, 45, 54, 58, 68–75)) can be formed. Interestingly, these very local conditions could  
297 be avoided through the presence of  $\text{MnO}_x$ , which can degrade hydrogen peroxide and  
298 catalyse the oxidation of nitrite to nitrate, which is a proton consuming process with increased  
299 rate at low pH (43). The latter proposition is confirmed here for the first time, as we show  
300 that biogenic  $\text{MnO}_x$  can catalyze nitrite oxidation even under physiological conditions (i.e. pH  
301 8).

302 The former hypothesis, i.e. that  $\text{MnO}_x$  can interfere with nitrite toxicity operating  
303 through peroxyxynitrite formation with hydrogen peroxide remains to be fully confirmed. Our  
304 experiments with spikes of hydrogen peroxide did not alter the gross dynamics of  $\text{MnO}_x$   
305 mediated nitrite-inhibition relief, but this could be due to the design of these experiments  
306 with hydrogen peroxide delivered in single doses rather than being delivered in a controlled  
307 manner in the vicinity of the cells. A single dose could have been readily dealt with additional  
308 peroxidases, without altering  $\text{MnO}_x$  mediated effects. On the other hand, our observation  
309 that the nitrite-stress is fully mitigated in NADH-supplemented cultures (even in the absence  
310 of  $\text{MnO}_x$ ) lends support to the idea that nitrite stress is mediated primarily through formation  
311 of peroxyxynitrite. In that case, the reductive power of NADH could be employed by  
312 peroxidases, as well as  $\text{MnO}_x$ , to reduce hydrogen peroxide (54–56) and thereby stopping  
313 the formation of peroxyxynitrite, explaining the observed mitigation effect of NADH.

314 These possible mechanistic scenarios of nitrite toxicity and roles of NADH,  
315 peroxidases, and  $\text{MnO}_x$  in mitigating it, raise the question about why cells that already have  
316 several peroxidases, such as AzwK-3b (17, 59) (see also Table S1), might invest additional

317 energy in the formation of MnO<sub>x</sub> precipitates. The answer might relate to the exact reaction  
318 mechanisms of ROS scavenging. It has been suggested, for example, that different ROS  
319 scavenging enzymes have different substrate affinities and efficiencies (58). In this context  
320 MnO<sub>x</sub> – mediated scavenging could be preferred under certain ROS concentrations and  
321 modes of production. In addition, and unlike peroxidases that require stoichiometric  
322 equivalents of reductants as e.g. NADH/NADPH for hydrogen peroxide reduction (57, 58),  
323 MnO<sub>x</sub> at its different oxidation states (II, III, IV) can directly catalyze degradation of hydrogen  
324 peroxide without NADH involvement (18, 19, 21, 40, 46–53). The fact that some peroxidases,  
325 as well as the AzwK-3b enzyme catalyzing MnO<sub>x</sub> formation, are exoenzymes (17, 76) could be  
326 also highly relevant. The expression of such exoenzymes is a ‘social trait’, that can be  
327 exploited by cheating cells that do not invest the costs but reap the benefits (32–35). The  
328 presented finding that MnO<sub>x</sub> forms dispersed granules in the culture shows that, in this case,  
329 the functional effects of the exoenzyme is localized. This kind of localization is a known  
330 strategy to stabilize a social trait in the face of evolution of cheating, as seen in exoenzymes  
331 with localized actions, involved in sugar degradation (77) and metal scavenging (78). Thus,  
332 the NADH investment into the formation of MnO<sub>x</sub> mediated protection might be a  
333 metabolically less costly strategy that is also socially more stable.

334 Within a wider context, our findings could be highly relevant to understand the  
335 different forms of metal mineralization observed in different microorganisms and under  
336 different ecological contexts. Given the abundance of microorganisms being involved in  
337 reactions of the nitrogen cycle, there is indeed potential transient accumulation of nitrite in  
338 different environments. It is also possible that MnO<sub>x</sub> (or other minerals) can provide more  
339 broad protection against ROS chemistry. For example, manganese oxidation is also observed  
340 in spore-forming bacteria (79, 80), fungi and other microorganisms (as reviewed and shown  
341 in (2, 36)), where a role for nitrite stress remains to be elucidated. Our findings will facilitate  
342 such further studies of bio-mineralizing organisms and their different functional motives and  
343 social strategies.

## 344 **Materials and Methods**

345 **Bacterial Strain and Culture Conditions.** *Roseobacter sp.* AzwK-3b was obtained from Colleen  
346 Hansel (Woods Hole Oceanographic Institution, Falmouth, MA/USA), who isolated the strain

347 (16). Cultures were grown in a defined medium, which was established by modifying the pre-  
348 defined artificial seawater (ASW) medium (22). This media is referred to as ASW<sub>m</sub> from now  
349 on, and its composition is shown in Table 1. ASW<sub>m</sub> contained sodium acetate as the sole  
350 carbon source (at concentrations specified per experiment), 200mM sodium chloride (instead  
351 of 428 mM, as in ASW), ammonium as nitrogen source (instead of nitrate, as in ASW), and five  
352 vitamins that were added as supplement. In manganese-supplemented ASW<sub>m</sub>, manganese  
353 chloride (MnCl<sub>2</sub>) was added to 200 μM. Cultures were grown at 30 °C in appropriate (100 ml)  
354 Erlenmeyer flasks (shaking at 150 rpm) or 96 well polystyrene plates (Corning Inc.) closed with  
355 lid and parafilm (shaking at 300 rpm). Plates were incubated in a CLARIOstar plate reader  
356 (BMG labtech) and absorbance measurements were done at 600 nm (A<sub>600</sub>) and with path  
357 length-correction, so to present absorbance per 1 cm.

358

359 **Electron microscopy (EM) and Energy Dispersive X-ray spectroscopy (EDS) analysis of AzwK-**  
360 **3b cultures.** A culture of AzwK-3b (40 ml in 100 ml Erlenmeyer flasks) was inoculated in ASW<sub>m</sub>  
361 without manganese and nitrite, and containing 50 mM acetate. After 3 days at 150 rpm and  
362 30 °C (by which time the culture reached the stationary phase), dilutions (25x – 200x) were  
363 made for a second passage of culture in the same medium, supplemented with 200 μM  
364 manganese. After further 2 days of culturing, samples for EM were prepared as follows: Cells  
365 from 2.5 ml culture were harvested by centrifugation (5 min at 5,000 g), and the supernatant  
366 was discarded. From here, several washing and dehydration steps were conducted by re-  
367 suspending the pellet in different solutions and subsequently centrifuging for 5 min at 5,000  
368 g (supernatant discarded): (1) first, pellets were twice re-suspended in ASW<sub>m</sub> medium basis  
369 (no manganese, no acetate, no ammonium, no nitrite, no trace metals); (2) afterwards,  
370 samples were re-suspended in 200 μl 70 % ethanol, incubated for 1 min, and pelleted by  
371 centrifugation; (3) for a washing-dehydration step, pellets were twice re-suspended in 200 μl  
372 100 % ethanol and harvested by centrifugation; (4) finally, samples were re-suspended in 100  
373 μl of 100 % ethanol. This suspension was then applied to Transmission Electron Microscopy  
374 (TEM) grids (Lacey carbon film coated copper grids (Agar Scientific)) by pipetting, in 1 μl  
375 portions (allowed to dry in between), until a total of 2 or 5 μl was accumulated (on different  
376 grids).

377 EM analysis was done on a Gemini SEM 500 (Zeiss) equipped with EDS X-Max detector  
378 (Oxford Instruments). Data analysis was done on the associated AZtec software, which  
379 contained the spectral information to identify individual elements. Electron micrographs had  
380 the best quality in scanning transmission EM mode (STEM) with a high angle annular dark  
381 field detector (HAADF). For EDS, the sample needed to be moved, and the HAADF detector  
382 had to be withdrawn, so the location of analysis after changing the setup was confirmed by  
383 additional scanning EM (SEM) recording.

384

385 **Large inocula preparation for nitrite-assays.** AzwK-3b was grown in Erlenmeyer flasks  
386 (usually 40 ml culture volume in 100 ml Erlenmeyer flasks) in ASW<sub>m</sub> with 25 mM acetate. The  
387 culture absorbance  $A_{600}$  was recorded regularly on a Spectronic 200 spectrophotometer  
388 (Thermo Fisher) with 1 cm path length polystyrene cuvettes, and inocula were sampled at  
389 various stages of the growth curve (e.g. see Figures S4, S5, S8). This culture was used to  
390 inoculate into 96 well plates, which were supplemented by 1:1 dilution with fresh medium  
391 supplemented with manganese and/or nitrite and other additives, as described for the  
392 particular results shown (see legends of Figures 3, 7, S6, S8). Where noted (see respective  
393 figure captions), the fresh medium used for dilution was also supplemented with NADH or  
394 hydrogen peroxide at different concentrations. NADH or hydrogen peroxide were added as  
395 last additives (to prevent reaction e.g. between hydrogen peroxide and  $Mn^{II}$  before  
396 inoculation) and the completed fresh medium was used immediately.

397

398 **Growth curve fitting and analysis.** Growth curves were analyzed using the R-package Grofit  
399 (23) applying the Gompertz growth model (23, 24). Plate reader data (measurements every  
400 10 minutes) were de-noised by averaging over 6 measurements (i.e. hourly averages). The  
401 maximum  $A_{600}$  reached was read directly from the data. For curve fitting, all data later than  
402 the maximum  $A_{600}$ , i.e. decaying growth phase, were removed. Then, the data was read  
403 backwards in time to find the first reading that was below 5 % of the maximum  $A_{600}$ . This data-  
404 trimming was done to facilitate the fitting of the Gompertz growth model without bias from  
405 different lag-phases (which were ignored), or different lengths and scales of decaying phases

406 recorded. From the resulting model, the maximum growth rate  $\mu$  (in  $A_{600\text{ nm}}$ (a.u.) per hour)  
407 was recorded.

408

409 **Preparation of cell-free bio-manganese oxide.** The procedure was adapted from previous  
410 publications using the cell free supernatant of *Roseobacter sp.* AzwK-3b grown in complex  
411 medium (16–19). AzwK-3b was grown in ASW<sub>m</sub> supplemented with 50 mM sodium acetate  
412 for nine days, using individual 50 or 100 ml cultures in 100 or 200 ml Erlenmeyer flasks,  
413 respectively, at 30 °C with shaking (150 rpm). In total, 2 liters of culture was prepared, cells  
414 were removed by centrifugation (5 minutes at 10,000 g) and the supernatants were  
415 combined. From this (cell-free) supernatant, individual samples of 100 or 200 ml were  
416 prepared and supplemented with 200  $\mu$ M manganese chloride, MnCl<sub>2</sub>. Manganese oxidation  
417 was allowed to proceed for five days at 30 °C with shaking (150 rpm), after which the  
418 manganese oxide was harvested by centrifugation (5 minutes at 10,000 g) from each 50/100  
419 ml sample . These were combined and washed by suspending in 25 ml acetate-free ASW<sub>m</sub>  
420 medium and re-sedimented by centrifugation. The pellet was brown in appearance and had  
421 considerable volume, indicating co-precipitation of organic material (e.g. secreted proteins)  
422 from the cell-culture supernatant. To estimate the amount of manganese precipitated in the  
423 assay, the supernatants from centrifugation and the washing steps were combined, and the  
424 residual manganese determined by the 3,3',5,5'-tetramethylbenzidine (TMB)-assay (25) for  
425 soluble manganese. Note that this was not a precise quantification, but was conclusive  
426 enough to allow conservative stoichiometric relations to be inferred. In particular, we inferred  
427 that ca. 75 % of the 200  $\mu$ M manganese chloride had been removed from the solution and  
428 this value was used for downstream calculations. The MnO<sub>x</sub> precipitate was suspended in an  
429 appropriate volume of the acetate-free medium to produce a “10 mM” suspension of  
430 manganese oxide, and this value is used in the manuscript as indicator for manganese oxide  
431 concentration. The pH was 8.2, which is well in line with the pH 8.0 of the ASW<sub>m</sub> medium,  
432 showing that the suspended manganese oxide did not alter the pH.

433

434 **Quantification of nitrite, nitrate and acetate.** Quantification was done by Ion  
435 Chromatography (IC) on a DIONEX ICS-5000+ (ThermoFisher, UK) equipped with conductivity

436 detector and a DIONEX IonPac AS11-HC-4 $\mu$ m (2 x 250 mm ThermoFisher, UK) anion  
437 separation column with appropriate guard column. Separation was achieved with a  
438 potassium hydroxide (KOH) gradient, with the KOH added to the eluent by electrolytic eluent  
439 generation and, before conductivity detection, removed by electrochemical eluent  
440 suppression (both the generation and suppression units are part of the ICS-5000+ system).  
441 Culture samples were filtered (0.22  $\mu$ m polyamide spin filter Costar Spin-X, Corning, NY/USA)  
442 and 10-fold diluted with MilliQ-water (checked for purity by measuring resistance (R); R > 18.2  
443 M $\Omega$ ), of which 2.5  $\mu$ l were injected for IC separation. The IC was run at flow rate of 0.38  
444 ml/min, column temperature 30 °C, and a conductivity detector cell temperature of 35 °C.  
445 The gradient condition, for the 37 minutes total run-time including 7 minutes pre-  
446 equilibration time, was: 7 minutes pre-run (equilibration) at 1.5 mM KOH before injection;  
447 remain 8 minutes at 1.5 mM KOH; increase to 15 mM KOH over 10 minutes; increase to 24  
448 mM KOH over 5 minutes; increase to 60 mM KOH over 1 minutes; remain at 60 mM KOH over  
449 6 minutes. Reference samples with known concentrations were run for calibration, from  
450 which the concentrations of nitrite, nitrate, and acetate in the samples was inferred. During  
451 the course of the experiments (see below) evaporation of the samples was noted (indicated  
452 by the increase in the peak area of chloride, which is expected to be unaltered by any biologic  
453 means and therefore should have displayed no concentration change). To correct for this  
454 evaporation effect, the concentrations of the analytes of interest were corrected by the same  
455 ratio as that obtained from the chloride peak area (from the beginning and end point samples  
456 of a particular time-course experiment).

## 457 **Author Contributions**

458 CZ, JCO and OSS designed the study and the experiments. CZ performed the  
459 experiments and analyzed the data. All authors contributed to the writing of the manuscript  
460 and have given approval to the final version.

## 461 **Acknowledgments**

462 This work is funded by The University of Warwick and by the Biotechnological and Biological,  
463 Natural Environment, and Engineering and Physical Sciences Research Councils (BB-, NE-,  
464 and EPSRC), with grant IDs: BB/K003240/2 (to OSS), NE/K009044/1 (to JCO) and



465 BB/M017982/1 (to the Warwick Integrative Synthetic Biology Centre, WISB). We would like  
466 to thank Colleen Hansel (Woods Hole Oceanographic Institution) for providing *Roseobacter*  
467 *sp.* AzwK-3b, and Steve York from the Electron Microscopy research technology platform (EM  
468 RTP) at the Materials Science Department (Physics, University of Warwick) for EM/EDS  
469 measurements.

## 470 References

- 471 1. Lowenstam H (1981) Minerals formed by organisms. *Science* 211(4487):1126–1131.
- 472 2. Hansel CM (2017) Manganese in marine microbiology. *Advances in Microbial*  
473 *Physiology - Microbiology of Metal Ions*, ed Poole RK (Academic Press, Oxford), pp 37–  
474 83.
- 475 3. Nealson KH (2006) The manganese-oxidizing bacteria. *Prokaryotes* 5:222–231.
- 476 4. Ghiorse WC (1984) Biology of iron-and manganese-depositing bacteria. *Annu Rev*  
477 *Microbiol* 38(1):515–550.
- 478 5. Spiro TG, Bargar JR, Sposito G, Tebo BM (2010) Bacteriogenic manganese oxides. *Acc*  
479 *Chem Res* 43(1):2–9.
- 480 6. Blöthe M, Wegorzewski A, Müller C, Simon F, Kuhn T, Schippers A (2015) Manganese-  
481 cycling microbial communities inside deep-sea manganese nodules. *Environ Sci Technol*  
482 49(13):7692–7700.
- 483 7. Tebo BM, Johnson HA, McCarthy JK, Templeton AS (2005) Geomicrobiology of  
484 manganese(II) oxidation. *Trends Microbiol* 13(9):421–428.
- 485 8. Geszvain K, Butterfield C, Davis RE, Madison AS, Lee S-W, Parker DL, Soldatova A, Spiro  
486 TG, Luther GW, Tebo BM (2012) The molecular biogeochemistry of manganese(II)  
487 oxidation. *Biochem Soc Trans* 40(6):1244–1248.
- 488 9. Myers CR, Nealson KH (1988) Bacterial manganese reduction and growth with  
489 manganese oxide as the sole electron acceptor. *Science* 240(4857):1319–21.
- 490 10. Venkateswaran K, Moser DP, Dollhopf ME, Lies DP, Saffarini DA, MacGregor BJ,  
491 Ringelberg DB, White DC, Nishijima M, Sano H, Burghardt J, Stackebrandt E, Nealson  
492 KH (1999) Polyphasic taxonomy of the genus *Shewanella* and description of *Shewanella*

- 493 *oneidensis* sp. nov. *Int J Syst Bacteriol* 49(2):705–24.
- 494 11. Lovley DR (1993) Dissimilatory metal reduction. *Annu Rev Microbiol* 47:263–90.
- 495 12. Emerson D, Fleming EJ, McBeth JM (2010) Iron-oxidizing bacteria: an environmental  
496 and genomic perspective. *Annu Rev Microbiol* 64:561–83.
- 497 13. Remucal CK, Ginder-Vogel M (2014) A critical review of the reactivity of manganese  
498 oxides with organic contaminants. *Environ Sci Process Impacts* 16(6):1247–66.
- 499 14. Sunda WG, Kieber DJ (1994) Oxidation of humic substances by manganese oxides yields  
500 low-molecular-weight organic substrates. *Nature* 367(6458):62–64.
- 501 15. Keiluweit M, Nico P, Harmon ME, Mao J, Pett-Ridge J, Kleber M (2015) Long-term litter  
502 decomposition controlled by manganese redox cycling. *Proc Natl Acad Sci*  
503 112(38):E5253–E5260.
- 504 16. Hansel CM, Francis CA (2006) Coupled photochemical and enzymatic Mn(II) oxidation  
505 pathways of a planktonic *Roseobacter*-Like bacterium. *Appl Environ Microbiol*  
506 72(5):3543–9.
- 507 17. Andeer PF, Learman DR, McIlvin M, Dunn JA, Hansel CM (2015) Extracellular haem  
508 peroxidases mediate Mn(II) oxidation in a marine *Roseobacter* bacterium via  
509 superoxide production. *Environ Microbiol* 17(10):3925–3936.
- 510 18. Learman DR, Voelker BM, Vazquez-Rodriguez AI, Hansel CM (2011) Formation of  
511 manganese oxides by bacterially generated superoxide. *Nat Geosci* 4(2):95–98.
- 512 19. Learman DR, Voelker BM, Madden AS, Hansel CM (2013) Constraints on superoxide  
513 mediated formation of manganese oxides. *Front Microbiol* 4:262.
- 514 20. Learman DR, Wankel SD, Webb SM, Martinez N, Madden AS, Hansel CM (2011)  
515 Coupled biotic–abiotic Mn(II) oxidation pathway mediates the formation and structural  
516 evolution of biogenic Mn oxides. *Geochim Cosmochim Acta* 75(20):6048–6063.
- 517 21. Luther GW (2010) The role of one- and two-electron transfer reactions in forming  
518 thermodynamically unstable intermediates as barriers in multi-electron redox  
519 reactions. *Aquat Geochemistry* 16(3):395–420.
- 520 22. Wilson WH, Carr NG, Mann NH (1996) The effect of phosphate status on the kinetics

- 521 of cyanophage infection in the oceanic cyanobacterium *Synechococcus sp.* WH78031.  
522 *J Phycol* 32(4):506–516.
- 523 23. Kahm M, Hasenbrink G, Lichtenberg-Fraté H, Ludwig J, Kschischo M (2010) Grofit:  
524 fitting biological growth curves with R. *J Stat Softw* 33(7):1–21.
- 525 24. Zwietering MH, Jongenburger I, Rombouts FM, van 't Riet K (1990) Modeling of the  
526 bacterial growth curve. *Appl Environ Microbiol* 56(6):1875–81.
- 527 25. Bosch Serrat F (1998) 3,3',5,5'-Tetramethylbenzidine for the colorimetric  
528 determination of manganese in water. *Mikrochim Acta* 129(1–2):77–80.
- 529 26. Tebo BM, Bargar JR, Clement BG, Dick GJ, Murray KJ, Parker D, Verity R, Webb SM  
530 (2004) Biogenic manganese oxides: properties and mechanisms of formation. *Annu Rev*  
531 *Earth Planet Sci* 32(1):287–328.
- 532 27. Templeton AS, Staudigel H, Tebo BM (2005) Diverse Mn(II)-oxidizing bacteria isolated  
533 from submarine basalts at Loihi seamount. *Geomicrobiol J* 22(3–4):127–139.
- 534 28. Francis CA, Co E-M, Tebo BM (2001) Enzymatic manganese(II) oxidation by a marine  $\alpha$ -  
535 proteobacterium. *Appl Environ Microbiol* 67(9):4024–4029.
- 536 29. Johnson HA, Tebo BM (2008) In vitro studies indicate a quinone is involved in bacterial  
537 Mn(II) oxidation. *Arch Microbiol* 189(1):59–69.
- 538 30. Wang X, Wiens M, Divekar M, Grebenjuk VA, Schröder HC, Batel R, Müller WEG (2010)  
539 Isolation and characterization of a Mn(II)-oxidizing *Bacillus* strain from the  
540 demosponge *Suberites domuncula*. *Mar Drugs* 9(1):1–28.
- 541 31. Kraft B, Strous M, Tegetmeyer HE (2011) Microbial nitrate respiration – Genes,  
542 enzymes and environmental distribution. *J Biotechnol* 155(1):104–117.
- 543 32. Cavaliere M, Feng S, Soyer OS, Jiménez JI (2017) Cooperation in microbial communities  
544 and their biotechnological applications. *Environ Microbiol* 19(8):2949–2963.
- 545 33. Allen B, Gore J, Nowak MA (2013) Spatial dilemmas of diffusible public goods. *Elife*  
546 2:e01169.
- 547 34. West SA, Diggle SP, Buckling A, Gardner A, Griffin AS (2007) The social lives of microbes.  
548 *Annu Rev Ecol Evol Syst* 38(1):53–77.

- 549 35. Allison SD (2005) Cheaters, diffusion and nutrients constrain decomposition by  
550 microbial enzymes in spatially structured environments. *Ecol Lett* 8(6):626–635.
- 551 36. Keim CN, Nalini HA, de Lena JC (2015) Manganese oxide biominerals from freshwater  
552 environments in Quadrilatero Ferrifero, Minas Gerais, Brazil. *Geomicrobiol J* 32(6):549–  
553 559.
- 554 37. Cammack R, Joannou C., Cui X-Y, Torres Martinez C, Maraj SR, Hughes MN (1999)  
555 Nitrite and nitrosyl compounds in food preservation. *Biochim Biophys Acta - Bioenerg*  
556 1411(2–3):475–488.
- 557 38. Müller-Herbst S, Mühlig A, Kabisch J, Rohtraud Pichner, Scherer S (2015) The food  
558 additives nitrite and nitrate and microbiological safety of food products. *Am J Microbiol*  
559 6(1):1–3.
- 560 39. Zhou Y, Oehmen A, Lim M, Vadivelu V, Ng WJ (2011) The role of nitrite and free nitrous  
561 acid (FNA) in wastewater treatment plants. *Water Res* 45(15):4672–82.
- 562 40. Robinson KM, Beckman JS (2005) Synthesis of peroxyxynitrite from nitrite and hydrogen  
563 peroxide. *Methods Enzymol*:207–214.
- 564 41. Heaselgrave W, Andrew PW, Kilvington S (2010) Acidified nitrite enhances hydrogen  
565 peroxide disinfection of acanthamoeba, bacteria and fungi. *J Antimicrob Chemother*  
566 65(6):1207–14.
- 567 42. Kono Y, Shibata H, Adachi K, Tanaka K (1994) Lactate-dependent killing of *Escherichia*  
568 *coli* by nitrite plus hydrogen peroxide: a possible role of nitrogen dioxide. *Arch Biochem*  
569 *Biophys* 311(1):153–159.
- 570 43. Luther, III GW, Popp JI (2002) Kinetics of the abiotic reduction of polymeric manganese  
571 dioxide by nitrite: an anaerobic nitrification reaction. *Aquat Geochemistry* 8(1):15–36.
- 572 44. Martínez MC, Andriantsitohaina R (2009) Reactive nitrogen species: molecular  
573 mechanisms and potential significance in health and disease. *Antioxid Redox Signal*  
574 11(3):669–702.
- 575 45. Tharmalingam S, Alhasawi A, Appanna VP, Lemire J, Appanna VD (2017) Reactive  
576 nitrogen species (RNS)-resistant microbes: adaptation and medical implications. *Biol*  
577 *Chem* 398(11):1193–1208.

- 578 46. Watts RJ, Sarasa J, Loge FJ, Teel AL (2005) Oxidative and reductive pathways in  
579 manganese-catalyzed Fenton's reactions. *J Environ Eng* 131(1):158–164.
- 580 47. Jiang S, Ashton WR, Tseung ACC (1991) An observation of homogeneous and  
581 heterogeneous catalysis processes in the decomposition of H<sub>2</sub>O<sub>2</sub> over MnO<sub>2</sub> and  
582 Mn(OH)<sub>2</sub>. *J Catal* 131(1):88–93.
- 583 48. Kanungo SB, Parida KM, Sant BR (1981) Studies on MnO<sub>2</sub>—III. The kinetics and the  
584 mechanism for the catalytic decomposition of H<sub>2</sub>O<sub>2</sub> over different crystalline  
585 modifications of MnO<sub>2</sub>. *Electrochim Acta* 26(8):1157–1167.
- 586 49. Rophael MW, Petro NS, Khalil LB (1988) II — kinetics of the catalytic decomposition of  
587 hydrogen peroxide solution by manganese dioxide samples. *J Power Sources*  
588 22(2):149–161.
- 589 50. Do S-H, Batchelor B, Lee H-K, Kong S-H (2009) Hydrogen peroxide decomposition on  
590 manganese oxide (pyrolusite): Kinetics, intermediates, and mechanism. *Chemosphere*  
591 75(1):8–12.
- 592 51. Li W, Liu Z, Liu C, Guan Y, Ren J, Qu X (2017) Manganese dioxide nanozymes as  
593 responsive cytoprotective shells for individual living cell encapsulation. *Angew Chem*  
594 *Int Ed Engl* 56(44):13661–13665.
- 595 52. Broughton DB, Wentworth RL (1947) Mechanism of decomposition of hydrogen  
596 peroxide solutions with manganese dioxide. I. *J Am Chem Soc* 69(4):741–744.
- 597 53. Broughton DB, Wentworth RL, Laing ME (1947) Mechanism of decomposition of  
598 hydrogen peroxide solutions with manganese dioxide. II. *J Am Chem Soc* 69(4):744–  
599 747.
- 600 54. Seaver LC, Imlay JA (2001) Alkyl hydroperoxide reductase is the primary scavenger of  
601 endogenous hydrogen peroxide in *Escherichia coli*. *J Bacteriol* 183(24):7173–7181.
- 602 55. Farr SB, Kogoma T (1991) Oxidative stress responses in *Escherichia coli* and *Salmonella*  
603 *typhimurium*. *Microbiol Rev* 55(4):561–85.
- 604 56. Nathan C, Bryk R, Griffin P (2000) Peroxynitrite reductase activity of bacterial  
605 peroxiredoxins. *Nature* 407(6801):211–215.
- 606 57. Zamocky M, Furtmüller PG, Obinger C (2008) Evolution of catalases from bacteria to

- 607 humans. *Antioxid Redox Signal* 10(9):1527–1548.
- 608 58. Mishra S, Imlay J (2012) Why do bacteria use so many enzymes to scavenge hydrogen  
609 peroxide? *Arch Biochem Biophys* 525(2):145–60.
- 610 59. Diaz JM, Hansel CM, Voelker BM, Mendes CM, Andeer PF, Zhang T (2013) Widespread  
611 production of extracellular superoxide by heterotrophic bacteria. *Science*  
612 340(6137):1223–6.
- 613 60. Camargo JA, Alonso A (2006) Ecological and toxicological effects of inorganic nitrogen  
614 pollution in aquatic ecosystems: A global assessment. *Environ Int* 32(6):831–49.
- 615 61. Cleemput O, Samater AH (1995) Nitrite in soils: accumulation and role in the formation  
616 of gaseous N compounds. *Fertil Res* 45(1):81–89.
- 617 62. Riley WJ, Ortiz-Monasterio I, Matson PA (2001) Nitrogen leaching and soil nitrate,  
618 nitrite, and ammonium levels under irrigated wheat in Northern Mexico. *Nutr Cycl*  
619 *Agroecosystems* 61(3):223–236.
- 620 63. Lawniczak AE, Zbierska J, Nowak B, Achtenberg K, Grześkowiak A, Kanas K (2016)  
621 Impact of agriculture and land use on nitrate contamination in groundwater and  
622 running waters in central-west Poland. *Environ Monit Assess* 188(3):172.
- 623 64. Beeckman F, Motte H, Beeckman T (2018) Nitrification in agricultural soils: impact,  
624 actors and mitigation. *Curr Opin Biotechnol* 50:166–173.
- 625 65. Cruz-García C, Murray AE, Klappenbach JA, Stewart V, Tiedje JM (2007) Respiratory  
626 nitrate ammonification by *Shewanella oneidensis* MR-1. *J Bacteriol* 189(2):656–662.
- 627 66. Chen Y, Wang F (2015) Insights on nitrate respiration by *Shewanella*. *Front Mar Sci* 1:80.
- 628 67. Zhang H, Fu H, Wang J, Sun L, Jiang Y, Zhang L, Gao H (2013) Impacts of Nitrate and  
629 Nitrite on Physiology of *Shewanella oneidensis*. *PLoS One* 8(4):e62629.
- 630 68. Quijano C, Trujillo M, Castro L, Trostchansky A (2016) Interplay between oxidant  
631 species and energy metabolism. *Redox Biol* 8:28–42.
- 632 69. Davies KJ (1995) Oxidative stress: the paradox of aerobic life. *Biochem Soc Symp* 61:1–  
633 31.
- 634 70. Gutteridge JM (1994) Biological origin of free radicals, and mechanisms of antioxidant

- 635 protection. *Chem Biol Interact* 91(2–3):133–40.
- 636 71. Korshunov S, Imlay JA (2010) Two sources of endogenous hydrogen peroxide in  
637 *Escherichia coli*. *Mol Microbiol* 75(6):1389–1401.
- 638 72. van der Heijden J, Vogt SL, Reynolds LA, Peña-Díaz J, Tupin A, Aussel L, Finlay BB (2016)  
639 Analysis of bacterial survival after exposure to reactive oxygen species or antibiotics.  
640 *Data Br* 7:894–899.
- 641 73. van der Heijden J, Vogt SL, Reynolds LA, Peña-Díaz J, Tupin A, Aussel L, Finlay BB (2016)  
642 Exploring the redox balance inside gram-negative bacteria with redox-sensitive GFP.  
643 *Free Radic Biol Med* 91:34–44.
- 644 74. Seaver LC, Imlay JA (2001) Hydrogen peroxide fluxes and compartmentalization inside  
645 growing *Escherichia coli*. *J Bacteriol* 183(24):7182–7189.
- 646 75. González-Flecha B, Demple B (1995) Metabolic sources of hydrogen peroxide in  
647 aerobically growing *Escherichia coli*. *J Biol Chem* 270(23):13681–13687.
- 648 76. Christie-Oleza JA, Scanlan DJ, Armengaud J (2015) “You produce while I clean up”, a  
649 strategy revealed by exoproteomics during *Synechococcus* - *Roseobacter* interactions.  
650 *Proteomics* 15(20):3454–3462.
- 651 77. Gore J, Youk H, van Oudenaarden A (2009) Snowdrift game dynamics and facultative  
652 cheating in yeast. *Nature* 459(7244):253–6.
- 653 78. Kümmerli R, Jiricny N, Clarke LS, West SA, Griffin AS (2009) Phenotypic plasticity of a  
654 cooperative behaviour in bacteria. *J Evol Biol* 22(3):589–98.
- 655 79. Francis CA, Tebo BM (2002) Enzymatic manganese(II) oxidation by metabolically  
656 dormant spores of diverse *Bacillus* species. *Appl Environ Microbiol* 68(2):874–880.
- 657 80. Bargar J., Tebo B., Villinski J. (2000) In situ characterization of Mn(II) oxidation by spores  
658 of the marine *Bacillus sp.* strain SG-1. *Geochim Cosmochim Acta* 64(16):2775–2778.
- 659 81. Tang YJ, Laidlaw D, Gani K, Keasling JD (2006) Evaluation of the effects of various  
660 culture conditions on Cr(VI) reduction by *Shewanella oneidensis* MR-1 in a novel high-  
661 throughput mini-bioreactor. *Biotechnol Bioeng* 95(1):176–184.
- 662 82. Balch WE, Fox GE, Magrum LJ, Woese CR, Wolfe RS (1979) Methanogens: reevaluation

663 of a unique biological group. *Microbiol Rev* 43(2):260–96.

664

665



666 **Figures**

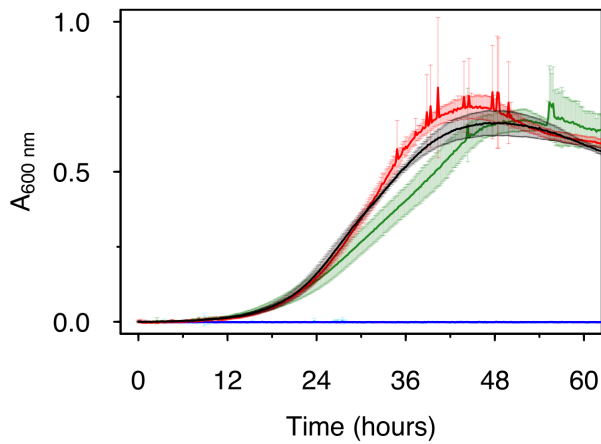

667

668 **Figure 1.** Effect of Mn<sup>II</sup> on the growth of *Roseobacter sp.* AzwK-3b in the defined growth  
669 medium (see Table 1). The concentrations of manganese were 0 μM (black), 200 μM (red)  
670 and 500 μM (dark green), with no growth (zero line) in the respective non-inoculated controls  
671 (blue, magenta, light blue). Cultures were grown in a 96 well plate (200 μl culture) with  
672 shaking and absorbance measurement every 10 minutes (see *Methods*).

673

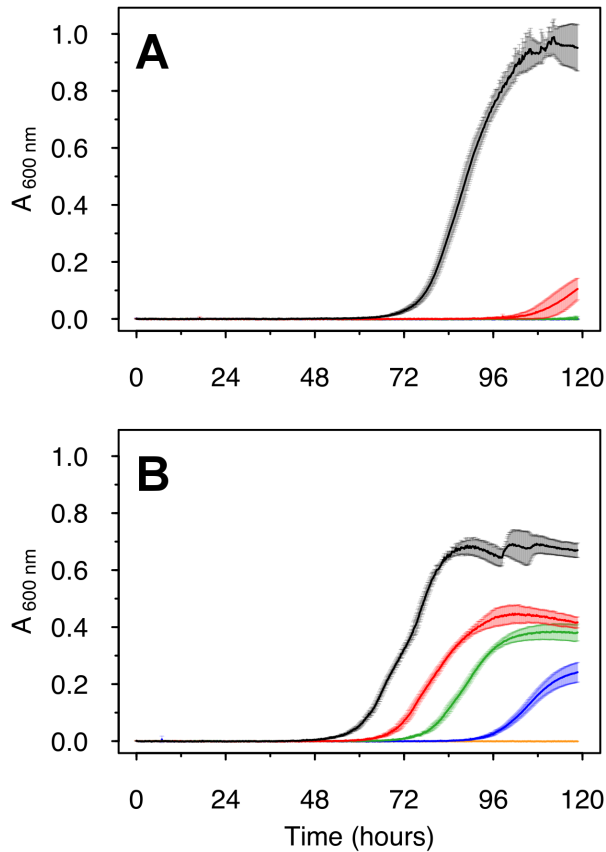

674

675 **Figure 2.** Growth of *Roseobacter sp. AzwK-3b* in the defined growth medium supplemented  
676 with sodium nitrite. Media were prepared without (Figure A) or with (Figure B) 200  $\mu\text{M}$   
677 manganese chloride,  $\text{Mn}^{\text{II}}\text{Cl}_2$ . Nitrite-concentrations were 0 mM (black), 0.25 mM (red), 0.5  
678 mM (green), 1 mM (dark blue) and 2.5 mM (light blue). All conditions were tested in  
679 triplicates, and the growth curves represent averages and their standard deviations (see  
680 *Methods*).

681

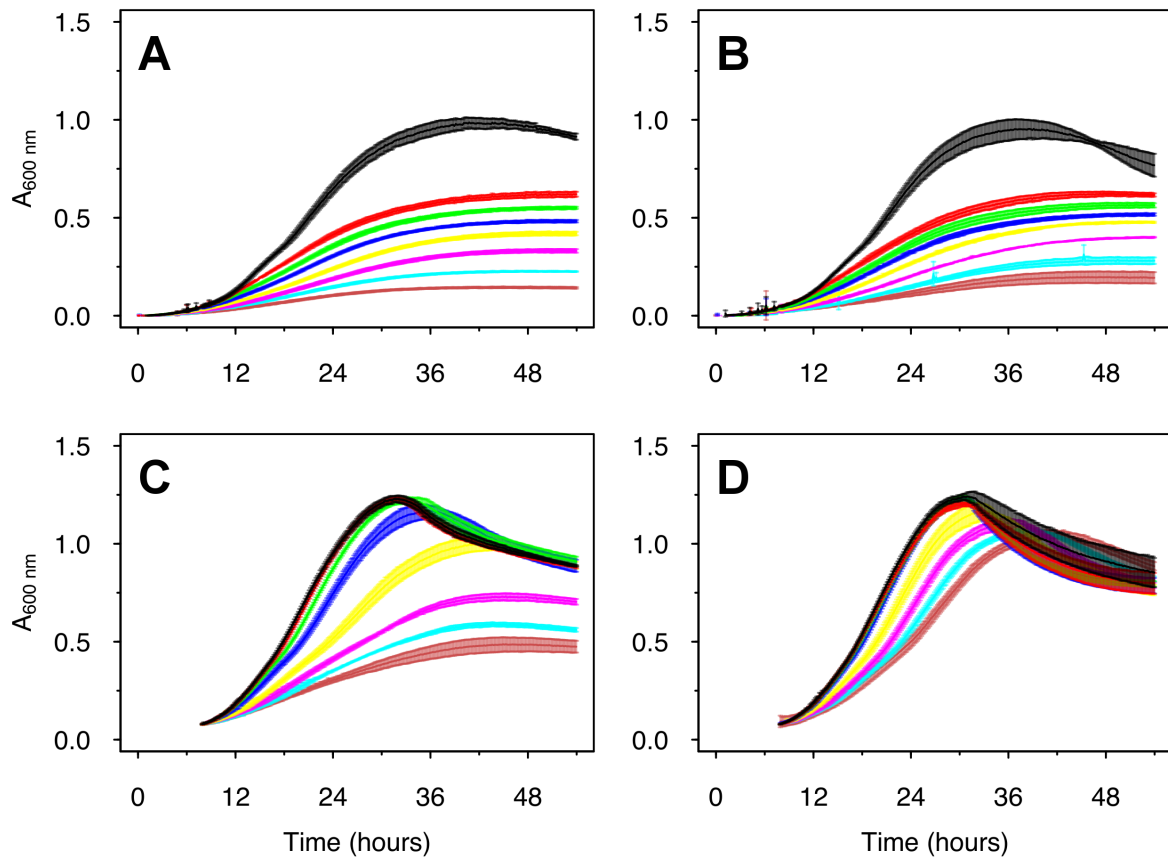

682

683 **Figure 3.** Larger AzwK-3b inocula are less inhibited by nitrite. A pre-culture without  
684 manganese or nitrite was grown and sampled in the exponential growth phase (Figure S4) to  
685 prepare inocula from a very early time point in the exponential phase (IT 1, Figures A and B),  
686 and from a later time point (IT 2, Figures C and D; both sampled in first third of exponential  
687 phase). These inocula were 1:1 diluted with fresh medium, and tested for growth at different  
688 nitrite concentrations (see below for colour code) without (A, C) or with (B, D) 200  $\mu\text{M}$   $\text{Mn}^{\text{II}}\text{Cl}_2$   
689 supplement. The nitrite concentrations were: Black – control no nitrite. Red – 0.25 mM nitrite.  
690 Green – 0.5 mM nitrite. Blue – 1 mM nitrite. Yellow – 2 mM nitrite. Magenta – 5 mM nitrite.  
691 Light blue – 7.5 mM nitrite. Dark red – 10 mM nitrite. Growth curves show the averages and  
692 standard deviations over a triplicate analysis (see *Methods*).

693

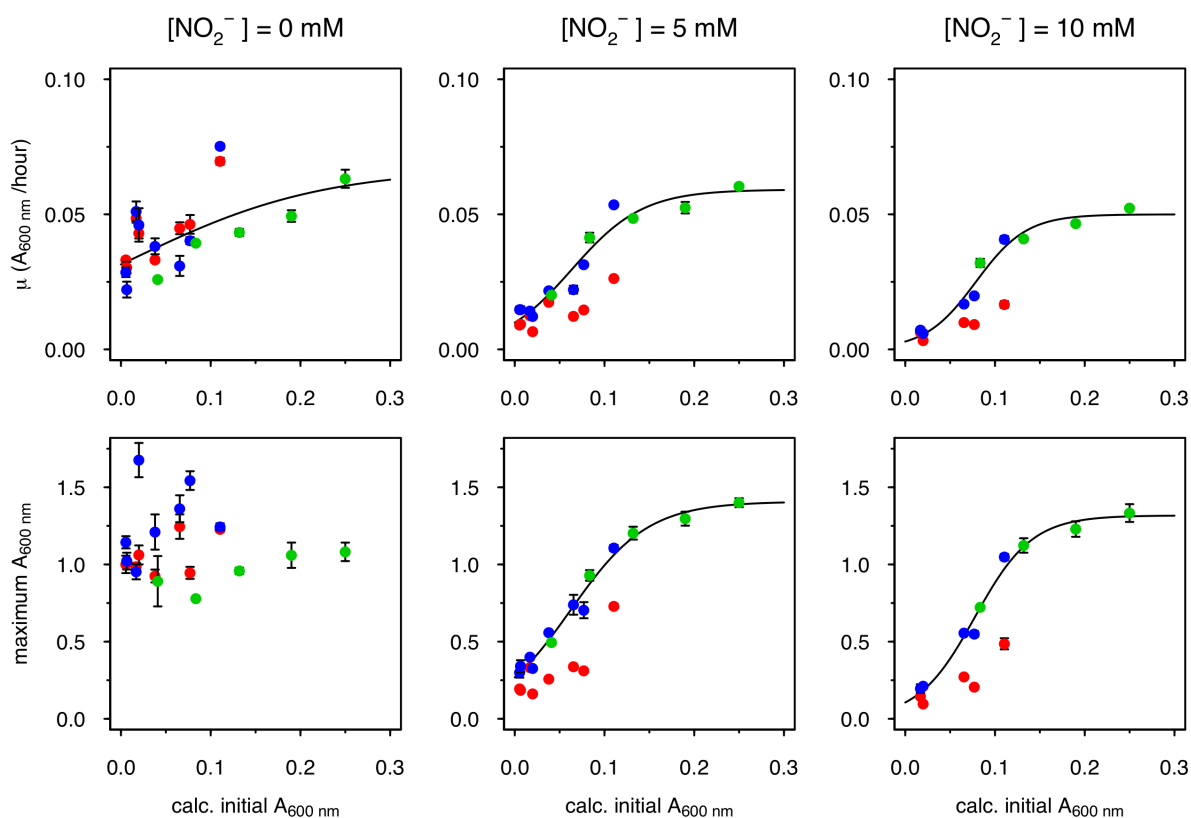

694

695 **Figure 4.** Inoculum-size effect on MnO<sub>x</sub> mediated mitigation of nitrite-inhibition. Data from  
696 different AzwK-3b growth experiments of similar type (“Large inocula”, see *Methods*) were  
697 analyzed for the maximum A<sub>600</sub> and growth rate by fitting the growth curves. Nitrite-  
698 concentrations of the main-cultures are indicated as headings of the figure-rows. The x-axes  
699 show the calculated A<sub>600</sub> of the cultures after diluting them 1:1 for the main-culture, while  
700 the y-axes show the maximum A<sub>600</sub> and maximum growth rate as calculated with the  
701 Gompertz model (23, 24)) (see *Methods*). The colours represent different conditions: **Red:**  
702 Neither pre-, nor main-culture contained manganese; **Blue:** Pre-culture without, main-culture  
703 with manganese; **Green:** both pre- and main-culture with manganese. The black curve is a  
704 sigmoidal fit (logistic model) from the Grofit R-package (23), for the results of the combined  
705 blue and green dataset where the nitrite-exposed main-cultures all contained manganese.

706

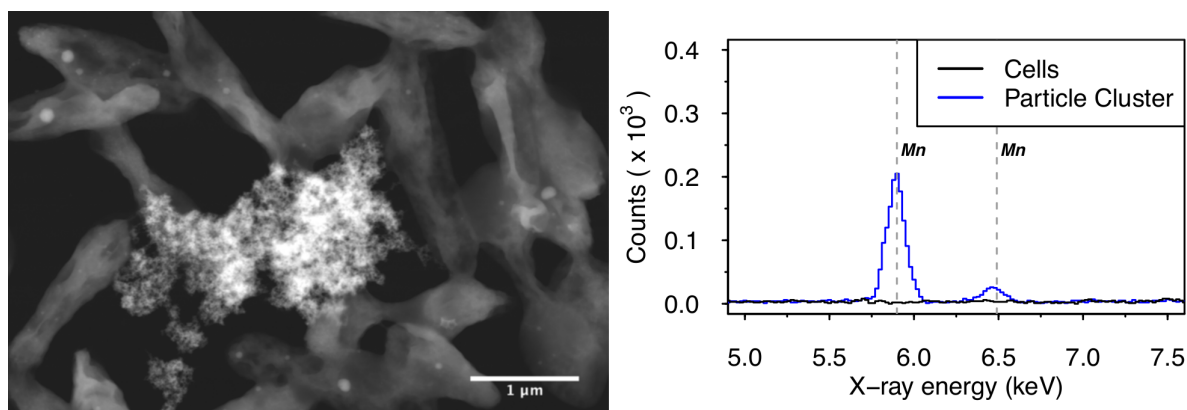

707

708 **Figure 5.** Scanning transmission electron micrograph (left figure, high angle annular dark field)  
709 of (granular) manganese-containing precipitate (center) surrounded by AzwK-3b cells, and  
710 associated energy dispersive X-ray spectroscopic analysis (right figure) in this location. Only  
711 the energy range containing the manganese-specific X-ray energies at 5.90 keV (K<sub>α</sub><sup>I</sup>) and 6.49  
712 keV (K<sub>β</sub><sup>I</sup>) is shown, and the manganese transitions are indicated by vertical gray dashed lines.

713

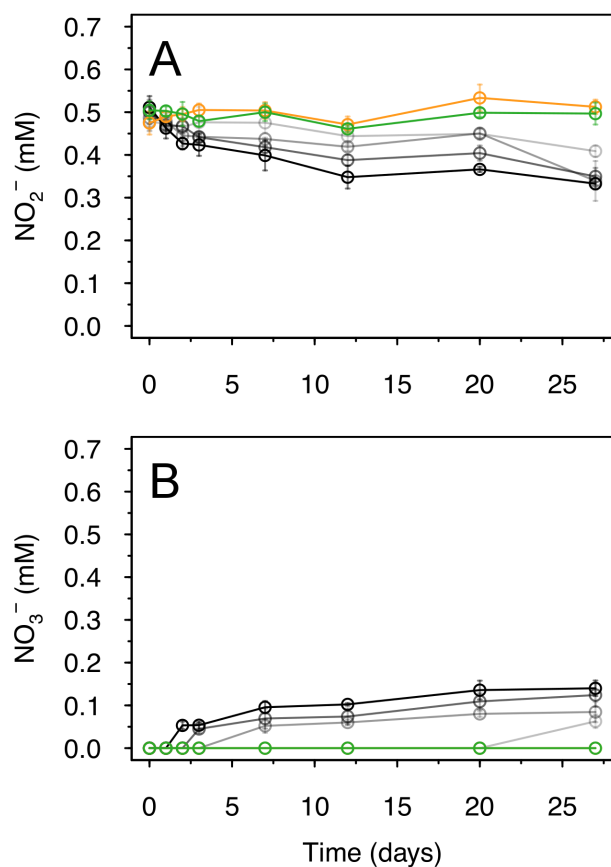

714

715 **Figure 6.** Oxidation of nitrite by biogenic manganese oxide (MnO<sub>x</sub>) produced in cell-free  
716 culture supernatant of AzwK-3b. The figures show the concentration of nitrite (A) and nitrate

717 (B), determined by ion chromatography, over time (note that concentrations were corrected  
718 for the IC-peak from chloride, to account for evaporation during the experiment). As controls,  
719 samples without  $\text{MnO}_x$  (green), or with  $\text{MnO}_2$  powder (orange) were included in the  
720 experiment (see *Methods*). The samples with AzwK-3b cell-free manganese oxide contained  
721 (from grey to black) 0.2, 0.5, 1 and 2 mM manganese oxide equivalent (see *Methods*).  
722

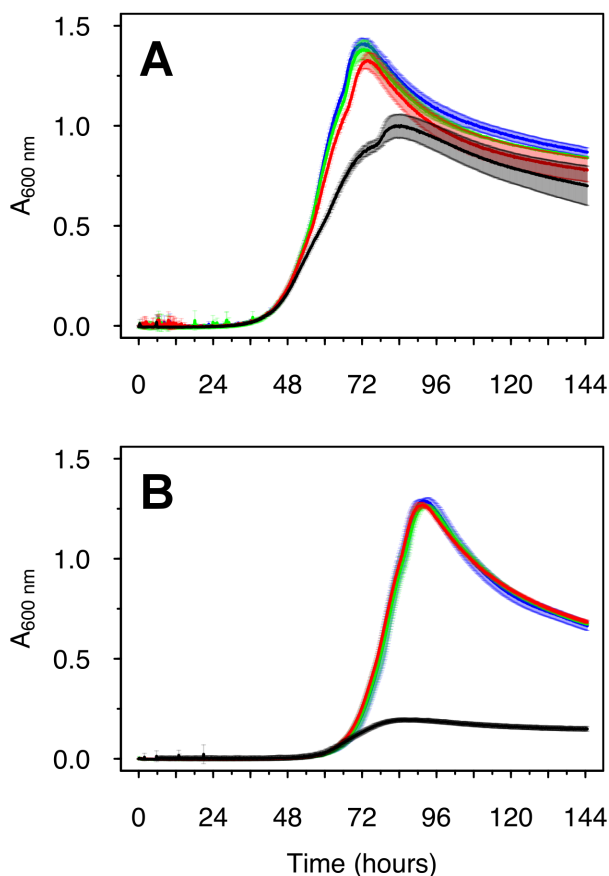

723

724 **Figure 7.** Reductive power (NADH) mitigates the growth inhibitory effects of nitrite in AzwK-  
725 3b. Cultures (pre- and main-culture without manganese) were grown in the absence (A) and  
726 presence (B) of 5 mM nitrite and supplement of 0, 50, 100 and 200  $\mu\text{M}$  NADH (black, red,  
727 grey, green and blue) at the start of the culture.

728

729

730 **Tables**

|                                                                                                    |            |
|----------------------------------------------------------------------------------------------------|------------|
| <b><u>Base salts (1 x AzwK-3b medium)</u></b>                                                      |            |
| Sodium chloride (NaCl)                                                                             | 200 mM     |
| Ammonium chloride (NH <sub>4</sub> Cl)                                                             | 8.82 mM    |
| Potassium chloride (KCl)                                                                           | 6.71 mM    |
| di-potassium hydrogenphosphate (KH <sub>2</sub> PO <sub>4</sub> )                                  | 131 μM     |
| Magnesium sulphate (MgSO <sub>4</sub> )                                                            | 14.2 mM    |
| Magnesium chloride (MgCl <sub>2</sub> )                                                            | 9.84 mM    |
| Calcium chloride (CaCl <sub>2</sub> )                                                              | 3 mM       |
| Tris(hydroxymethyl)aminomethane (TRIS)                                                             | 1.1 mM     |
| <b>pH of the medium</b>                                                                            | <b>8.0</b> |
| <b><u>Trace metal solutio (1,000 x)</u></b>                                                        |            |
| Copper chloride (CuCl <sub>2</sub> )                                                               | 32 μM      |
| Zink sulphate (ZnSO <sub>4</sub> )                                                                 | 765 μM     |
| Cobalt chloride (CoCl <sub>2</sub> )                                                               | 169 μM     |
| Sodium molybdate (Na <sub>2</sub> MoO <sub>4</sub> )                                               | 1.65 mM    |
| Boric acid (H <sub>3</sub> BO <sub>3</sub> )                                                       | 46.3 mM    |
| Nickel chloride (NiCl <sub>2</sub> )                                                               | 4.2 mM     |
| Sodium tungstate (Na <sub>2</sub> WO <sub>4</sub> )                                                | 243 μM     |
| Sodium selenite (Na <sub>2</sub> SeO <sub>3</sub> )                                                | 228 μM     |
| <b><u>Additional (1,000 x) supplement solutions</u></b>                                            |            |
| Iron chloride (FeCl <sub>3</sub> ; prepared in 10 mM HCl, balanced with extra 10 mM NaOH solution) | 10.4 mM    |
| Ethylendiaminetetraacetate (EDTA, pH 8.0; sodium salt)                                             | 1.34 mM    |
| Manganese chloride (MnCl <sub>2</sub> , only added where desired)                                  | 200 mM     |
| <b><u>Vitamin supplement (1,000 x)</u></b>                                                         |            |
| Biotin                                                                                             | 82 μM      |
| Pyridoxine hydrochloride                                                                           | 484 μM     |
| Thiamine hydrochloride                                                                             | 148 μM     |
| Riboflavin                                                                                         | 133 μM     |
| Nicotinic acid                                                                                     | 406 μM     |

731 **Table 1.** Detailed composition of the defined AzwK-3b growth medium, ASW<sub>m</sub>. The medium  
 732 was developed starting out from artificial seawater (ASW) (22) with extra trace metals taken  
 733 from (9, 81) and a 5-vitamin solution identified starting out from Wolfe's vitamin mixture (82).
